# Supplementary material
Source: publisher figshare collection journal article supplement (https://tandf.figshare.com/ndownloader/files/12863168)
Supplement: Supplementary file 1 [file 12863168]

# Appendix

| Chinese Pinyin | English | Chinese Pinyin | English | Chinese Pinyin | English |
| --- | --- | --- | --- | --- | --- |
| hong shui | flood | ni shi liu | mudslide | tie lu jiao tong shi gu | rail accident |
| nei lao | waterlogging | shan ti beng ta | mountain collapse | cheng shi gui dao jiao tong shi gu | urban rail accident |
| ling xun | ice flood | di mian ta xian | surface collapse | min yong hang kong qi shi gu | civil aircraft accident |
| shan hong zai hai | flash flood | di lie feng | ground fissures | dian li shi gu | electricity accident |
| nong ye gan han | Agricultural drought | di mian chen jiang | ground subsidence | nong ye ji xie shi gu | agricultural machinery accident |
| tai feng | typhoon | huo shan pen fa | volcanic eruption | cai ta | stampede |
| long juan feng | tornado | hai xiao | tsunami | he shi gu | nuclear accident |
| bao yu | rainstorm | feng bao chao | storm tide | fu she shi gu | radiation accident |
| bao xue | blizzard | hai bing | sea ice | chuan ran bing | infectious disease |
| han chao | cold wave | ju lang | billow | shi pin an quan | food safety |
| da feng | gale | chi chao | harmful algal bloom | yao ping an quan | drug safety |
| sha chen bao | sandstorm | sheng wu zai hai | biological disaster | qun ti xing zhong du | group poisoning |
| di wen dong hai | freeze injury | cao yuan huo zai | prairie fire | gan ran | infection |
| gao wen | high temperature | sen lin huo zai | forest fire | dong wu yi qing | animal epidemic |
| re lang | heat wave | mei kuang shi gu | mine accident | qun ti xing bu ming yuan yin ji bing | group of unexplained disease |
| gan re feng | dry hot wind | jian zhu ye shi gu | construction accident | qun ti xing shi jian | group event |
| xia ji bao liu | downburst | wei xian hua xue pin | hazardous chemical | xing shi an jian | criminal case |
| xue beng | avalanche | yan hua bao zhu shi gu | fireworks accident | jin rong tu fa shi jian | financial emergency |
| lei dian | thunder | huo zai | fire disaster | kong bu xi ji | terrorist attack |
| bing bao | hail | dao lu jiao tong shi gu | traffic accident | she wai shi jian | foreign event |
| shuang dong | frost | shui wu ran | water pollution | xin xi an quan | information security |
| da wu | fog | kong qi wu ran | air pollution | shui ku kua ta | reservoir collapse |
| di zhen | earthquake | hai shang yi you shi gu | oil spill at sea | di fang jue kou | dam burst |
| hua po | landslide | shui shang jiao tong shi gu | water traffic accident | rong xue | snowmelt |
| cheng zhen huo zai | town fire | / | / | / | / |
